# Supplementary material for: Autonomous nanocomposite electrochemical sensing of antibiotics across aquatic ecosystems
Source: Research Square preprint supplement (doi:10.21203/rs.3.rs-7396857/v1), 2026-02-16
Supplement: Supplementary file 1 [file 09f225eb71ca23eec1bd4a57.docx]

# **Autonomous nanocomposite electrochemical sensing of antibiotics across aquatic ecosystems**

Peng Chen a, [[1]](#footnote-1), Feiyun Huang b, 1, Liping Luo a, Jingquan Wang a, c, Min Zheng c, *, Hongguang Guo a, d ,*

*a State Key Laboratory of Intelligent Construction and Healthy Operation and Maintenance of Deep Underground Engineering, College of Architecture and Environment, Sichuan University, Chengdu,* *Sichuan Province, 610065, China.*

*b Key Laboratory of Bio-Resources and Eco-Environment (Ministry of Education), College of Life Sciences, Sichuan University, Chengdu, Sichuan Province, 610065, China.*

*c Water Research Centre, School of Civil and Environmental Engineering, University of New South Wales, Sydney, NSW, 2052, Australia.*

*d Key Laboratory of Leather Chemistry and Engineering (Sichuan University), Ministry of Education, Chengdu, Sichuan Province, 610065, China.*

**SUPPLEMENTARY MATERIAL**

# **Text S1: Ti₃C₂Tₓ Nanosheets Synthesis**

Ti₃AlC₂ MAX phase (where M = Ti, A = Al, X = C) precursor was synthesized by ball-milling Ti, Al, and C powders at a molar ratio of 3:1.1:1.8 under argon protection (400 rpm, 4 h), followed by heating in flowing argon to 1350°C at a heating rate of 5°C/min for 2 h 1. The resulting MAX phase exhibited characteristic layered bulk morphology with well-defined crystalline structure **(Figure S1a)**. Ti₃C₂Tₓ was obtained by immersing 1 g of Ti₃AlC₂ in an etchant solution containing LiF (1.5 g) and 9 mol/L HCl (20 mL) at 35°C with mechanical stirring for 24 h 2. This selective etching process removes aluminum atoms from the MAX phase while preserving the Ti-C framework, resulting in multilayer Ti₃C₂Tₓ with accordion-like morphology **(Figure S1b)**. The resulting product was centrifuged (3500 rpm, 10 min), washed to pH ~6, and sonicated in an ice bath for 10 min to achieve delamination 3. X-ray diffraction (XRD) analysis confirmed successful etching with characteristic peak shifts and the removal of MAX phase impurities while maintaining Ti₃C₂Tₓ crystallographic integrity **(Figure S1d)**. Final low-speed centrifugation (1500 rpm, 15 min) removed unexfoliated particles, yielding stable Ti₃C₂Tₓ nanosheets with surface terminations (-OH, -F, -O) **(Figure S1c)** 4.

# **Text S2: rGAM Composite Fabrication**

Graphene oxide (GO) was prepared using a modified Hummers method 5, exhibiting characteristic wrinkled morphology **(Figure S2a)**. Silver nanowires (AgNWs) were synthesized via a modified polyol method by dissolving PVP (5 g) in 100 mL ethylene glycol at 160°C, followed by dropwise addition of AgNO₃ (0.2 g in 20 mL ethylene glycol) 6. After 90 min reaction under N₂ protection, the product was cooled, centrifuged (8000 rpm, 10 min), and washed with ethanol to remove excess PVP 7, and were redispersed in ethanol (5 mg/mL) 8. The obtained AgNWs displayed uniform wire morphology with high aspect ratios **(Figure S2e).** The composite sensor was fabricated by stirring GO solution (1 mg/mL, 5 mL) with AgNWs suspension (5 mg/mL, 5 mL) for 2 h, then drop-casting 100 μL onto a glassy carbon electrode surface and drying 9. Subsequently, delaminated Ti₃C₂Tₓ nanosheets (2.8 μg) were mixed with the GO/AgNWs dispersion, drop-cast, and dried at 50°C. Finally, GO was electrochemically reduced in 0.1 mol/L PBS buffer (pH 7.0) by cyclic voltammetry (-1.5 to 0.0 V, 50 mV/s, 5 cycles) to obtain the rGAM electrode 10. This electrochemical reduction process transforms GO into reduced graphene oxide (rGO), as evidenced by significant morphological changes **(Figure S2b-c)** and Fourier-transform infrared spectroscopy (FTIR) spectral modifications showing the removal of oxygen-containing functional groups **(Figure S2d)**. XRD patterns revealed the crystalline structure of pure AgNWs and the phase composition of the rGO/AgNWs composite, confirming successful composite formation **(Figure S2f)**.

# **Text S3: Detailed Structural and Morphological Characterization Methodology**

Comprehensive structural and morphological characterization of rGAMO-ECs materials employed multiple complementary analytical techniques. Transmission electron microscopy (TEM) and high-resolution TEM (HRTEM) imaging were performed using a FEI Tecnai G2 F30 instrument (FEI Company, USA) operated at 300 kV accelerating voltage to investigate morphology and lattice fringes of rGO, AgNWs, Ti₃C₂Tₓ, and rGO/AgNWs@Ti₃C₂Tₓ composites. Selected area electron diffraction (SAED) patterns were acquired to analyze crystallinity and phase composition. Energy-dispersive X-ray spectroscopy (EDS) elemental mapping was conducted in scanning transmission electron microscopy (STEM) mode to analyze spatial distribution of nitrogen (N), carbon (C), silver (Ag), oxygen (O), and titanium (Ti) elements throughout the rGAMO-ECs composite structure. Micro-infrared imaging (Micro-IR) was performed using an Agilent Cary 670-620 FTIR spectrometer (Agilent Technologies, USA) equipped with a microscope accessory to map carbonyl group distribution (C=O stretching vibration at 1735 cm⁻¹) in Ti₃C₂Tₓ, rGO@Ti₃C₂Tₓ, AgNWs@Ti₃C₂Tₓ, and rGO/AgNWs@Ti₃C₂Tₓ samples using attenuated total reflectance (ATR) mode with 4 cm⁻¹ spectral resolution over the wavenumber range of 600-4000 cm⁻¹. Scanning electron microscopy (SEM) with elemental mapping was conducted using a Hitachi SU8010 field-emission scanning electron microscope (Hitachi High-Technologies Corporation, Japan) to examine surface morphology and spatial distribution of C, Ti, O, and Ag elements at magnifications ranging from 75× to 20,000×. X-ray photoelectron spectroscopy (XPS) measurements were performed on a Thermo Fisher Scientific K-Alpha⁺ spectrometer (Thermo Fisher Scientific, USA) with monochromatic Al Kα X-ray source to analyze surface elemental composition and chemical valence states, with the C 1s peak at 284.8 eV serving as the internal binding energy reference. X-ray diffraction (XRD) patterns were collected using a Rigaku MiniFlex 600 diffractometer (Rigaku Corporation, Japan) with Cu Kα radiation (λ = 1.5406 Å) to assess crystallographic structure and phase composition. Fourier-transform infrared spectroscopy (FTIR) analysis was conducted using a Thermo Fisher Scientific Nicolet iS50 FTIR spectrometer (Thermo Fisher Scientific, USA) to identify functional groups and chemical bonding characteristics. Confocal laser scanning microscopy (CLSM) observations were performed using a Leica TCS SP8 confocal microscope (Leica Microsystems, Germany) to examine three-dimensional microstructure and interfacial characteristics of the composite materials.

# **Text S4: Optimization and Validation of rGAM Electrode Performance**

The rGAM electrode was systematically optimized to establish optimal component loadings and validate its electrochemical performance for subsequent antibiotic detection experiments. Based on preliminary GO substrate optimization **(25 μg, Table S1)**, gradient experiments were conducted to determine the optimal loadings of Ti₃C₂Tₓ and AgNWs. As shown in **Figure S3a-b**, DPV responses to 10 μmol/L CIP increased with Ti₃C₂Tₓ and AgNWs loading up to 2.5 μg, beyond which the response plateaued or declined. Response surface methodology **(Figure S3c)** further refined the optimal composition to 25 μg GO, 2.8 μg Ti₃C₂Tₓ, and 2.8 μg AgNWs, achieving maximum electrochemical response. Cyclic voltammetry confirmed successful electrochemical reduction ofGO/AgNWs@Ti₃C₂Tₓ (GAM) to rGO/AgNWs@Ti₃C₂Tₓ (rGAM) within 5 cycles **(Figure S3d)**. EIS measurements **(Figure S3e, Table S2)** showed that the rGAM electrode exhibited a charge transfer resistance (Rct) of 136.8 Ω and a CPE exponent (n) of 0.831, indicating excellent charge transfer kinetics and near-ideal capacitive behavior. The rGAM electrode demonstrated robust anti-interference capability against common inorganic ions (1 mmol/L K⁺, Na⁺, Mg²⁺, Zn²⁺, Cu²⁺, Cl⁻, NO₃⁻, SO₄²⁻, PO₄³⁻) while maintaining specific responses to antibiotics **(Figure S3f)**. CV scans at varying scan rates (20-240 mV/s) retained 95.6% of the initial signal **(Figure S3g)**, confirming excellent operational stability. The linear relationship between peak current (Ipo, Ipr) and the square root of scan rate **(R² > 0.99, Figure S3h, Table S3)** indicated a diffusion-controlled detection process, with calculated diffusion coefficients of 2.81×10⁻⁹ cm²/s. Ten independently fabricated rGAM electrodes exhibited a relative standard deviation of only 2.7% **(Figure S3i)**, demonstrating excellent reproducibility. These results validated that the rGAM electrode possessed optimal electrochemical performance, operational stability, anti-interference capability, and reproducibility, providing a reliable foundation for subsequent antibiotic detection experiments.

# **Text S5: Detailed Machine Learning Analysis Methodology**

Six electrochemical parameters were extracted from rGAMO-ECs measurements across 600 experimental runs: I-T Peak current, I-T Area, I-T Width from chronoamperometry, and LSV equilibration potential (Ep), LSV peak current (Ip), LSV Slope from linear sweep voltammetry. Measurements were conducted at seven concentration levels (100-1000 nM) for CIP, SMX, and their mixtures. The SHapley Additive exPlanations (SHAP) framework was implemented to quantify feature contributions to antibiotic classification. Mean absolute SHAP values ranked concentration-dependent feature importance. SHAP beeswarm plots visualized feature impact distribution with color intensity representing feature values, while waterfall plots decomposed individual predictions to quantify each electrochemical parameter's contribution.t-distributed Stochastic Neighbor Embedding (t-SNE) reduced the six-dimensional feature space into two-dimensional projections, preserving local neighborhood structures and revealing clustering patterns among CIP, SMX, and mixture samples (perplexity = 30, 1000 iterations).

Three machine learning algorithms were evaluated: XGBoost, Random Forest, and Support Vector Machine with radial basis function kernel. Hyperparameters were optimized using grid search with 10-fold cross-validation. Model performance was assessed using accuracy, precision, recall, F1-score, and AUC. Confusion matrices evaluated classification accuracy, and learning curves assessed model generalization by plotting training and validation accuracy versus training set size. Pairwise feature interaction strengths were quantified using SHAP interaction values and visualized in heatmaps. Third-order polynomial regression models (SHAP = β₀ + β₁x + β₂x² + β₃x³) captured non-linear relationships between features and SHAP values, with performance evaluated using RMSE and MAE. Bootstrap sampling (1000 iterations) estimated coefficient confidence intervals.

# **Text S6: Electrochemical Data Analysis Equations and Calculations**

CIP hydrochloride monohydrate (C₁₇H₁₈FN₃O₃·HCl·H₂O, ≥98% purity, MW: 385.82 g/mol) and SMX (C₁₀H₁₁N₃O₃S, ≥99% purity, MW: 253.28 g/mol) were purchased from Sigma-Aldrich (St. Louis, USA) and used without further purification. Stock solutions (10 mM) were prepared in ultrapure water (18.2 MΩ·cm) with 0.1% DMSO to enhance solubility, stored at 4°C, and used within 30 days. All other chemicals were analytical grade or higher. All experiments were performed in triplicate, and results are presented as mean ± standard deviation. The oxidation peak current (Ip) was calculated using the Randles-Sevcik equation 11:

where n is the number of transferred electrons, A is the effective electrode area (cm²), D is the diffusion coefficient (cm²/s), C is the analyte concentration (mol/cm³), and v is the scan rate (V/s).

The diffusion coefficient (D) was derived from equation (2):

The electrochemical catalytic current (IEC) and peak potential value (PEV) were defined as:

where Ip, cat represents the catalytic current, Ip, blank is the blank current, Ep, sample is the sample peak potential, and Ep, blank is the blank peak potential.

The limit of detection (LOD) was calculated using the formula:

where σ is the standard deviation of blank measurements and m is the slope of the calibration curve. The limit of quantification (LOQ) was calculated as:

# **Text S7: Real Sample Testing and Vessel-based Offshore Monitoring**

Real water validation experiments were designed to assess rGAMO-ECs performance across diverse aquatic matrices with varying complexity levels. Water sample collection followed standardized environmental monitoring protocols (EPA Method 1694) with proper chain of custody documentation. Natural water samples were collected from three distinct environments: (1) Mingyuan Lake representing calm freshwater systems with moderate organic content, (2) Jiang'an River representing flowing freshwater with dynamic conditions and variable suspended solids, and (3) local pond water representing stagnant systems with high organic matter and algal content. Tap water served as a control matrix with relatively simple ionic composition. All samples were collected in pre-cleaned amber glass bottles, transported at 4°C, and processed within 24 hours to minimize degradation. Sample preparation involved sequential filtration through 1.2 μm glass fiber filters to remove large particulates, followed by 0.45 μm nylon membrane filters to eliminate suspended solids while preserving dissolved matrix components. Filtered samples were adjusted to pH 7.0 ± 0.2 using phosphate buffer and stored at 4°C until analysis. Recovery studies employed standard addition methods with antibiotic concentrations ranging from 50-1000 nM, prepared fresh before each experiment.

Synthetic urine preparation followed established protocols to simulate biological matrix complexity for potential clinical applications. The synthetic urine medium was prepared in 4L volumes with the following composition: sodium acetate (10.93 g, final concentration 2000 mg/L), KCl (2.96 g), NaCl (2.32 g), KH₂PO₄ (2.72 g), K₂HPO₄·3H₂O (4.56 g), NH₄Cl (1.12 g), and trace mineral solution (0.4 mL A5 culture medium). The mixture was sterilized at 105°C for 20 minutes and cooled to room temperature before aseptically adding MgSO₄·7H₂O stock solution (40 mL of 10 g/L) and CaCl₂ stock solution (40 mL of 10 g/L). The final solution was adjusted to pH 6.8 ± 0.3 to mimic physiological urine pH and stored at 4°C for up to 7 days.

The unmanned surface vessel (USV) system incorporated a waterproof aluminum hull (1.2 m × 0.8 m × 0.4 m) equipped with dual brushless motors providing 4-hour autonomous operation. The integrated rGAMO-ECs sensing module featured a 5L flow-through reaction chamber with peristaltic pumping (50 mL/min), automated sample conditioning, and real-time electrochemical analysis. GPS navigation enabled precise positioning (±2 m accuracy) with programmable waypoint navigation and emergency return-to-home functionality. Data transmission utilized 4G LTE connectivity with backup satellite communication for remote monitoring. Concurrent water quality monitoring included pH, dissolved oxygen, turbidity, and temperature sensors for comprehensive environmental characterization. Preliminary design testing indicated that the system demonstrated potential for long-term autonomous monitoring in complex aquatic environments, providing a technical foundation for large-scale regional monitoring applications.

# **Text S8: Statistical Analysis and Data Processing Methodology**

Statistical analysis and data processing involved multiple software platforms and analytical methods. Linear regression analysis and calibration curve fitting were performed using Origin 2021 (OriginLab Corporation, USA) with locally weighted scatterplot smoothing (loess) using span parameter of 0.5 for optimal balance between smoothness and fidelity to data 12. Machine learning model development and evaluation employed Python 3.9 with scikit-learn (version 1.2.0) for preprocessing, model training, and cross-validation, XGBoost (version 1.7.0) for gradient boosting classification, and NumPy/Pandas for data manipulation. Three classification algorithms (XGBoost, Random Forest, Support Vector Machine) were compared using 5-fold cross-validation, with model performance evaluated through accuracy, precision, recall, F1-score, and area under the receiver operating characteristic curve (AUC-ROC). t-SNE (t-distributed Stochastic Neighbor Embedding) dimensionality reduction employed scikit-learn manifold module with perplexity = 30, learning rate = 200, and 1000 iterations for three-dimensional visualization of electrochemical feature space. Method comparison between rGAMO-ECs and LC-MS/MS measurements utilized Pearson correlation coefficient and Bland-Altman analysis, with the latter plotting the difference between methods against their average to calculate mean bias and 95% limits of agreement (mean difference ± 1.96 × SD). Statistical hypothesis testing and correlation analysis employed R software (version 4.2.2) with "ggcor" (version 0.9.8) for correlation matrices, "vegan" (version 2.6.2) for multivariate analysis, and "stats" package for basic statistical functions 13. XPS spectra deconvolution and peak fitting were performed using CasaXPS software (version 2.3.16, Casa Software Ltd., UK) with Shirley-type background subtraction and Gaussian-Lorentzian mixed functions (70% Gaussian contribution), with peak positions calibrated using adventitious carbon C 1s peak at 284.8 eV as internal reference 14

. Intermolecular interaction energy analysis employed SciPy curve_fit function with Lennard-Jones 12-6 potential model [V(r) = 4ε[(σ/r)¹² - (σ/r)⁶]], where ε represents interaction strength and σ represents equilibrium distance, using nonlinear least-squares optimization for parameter fitting 15. SHAP (SHapley Additive exPlanations) analysis for feature importance interpretation was performed using the "shap" package in R environment with visualization via ggplot2, lattice, and plotly packages using "Spectral" color palette 16. For statistical hypothesis testing, normality was assessed using Shapiro-Wilk test; for normally distributed data, independent samples t-test or one-way ANOVA with Tukey's post-hoc test was applied, while Mann-Whitney U test or Kruskal-Wallis test was used for non-normal distributions. Statistical significance threshold was set at P < 0.05. All experimental data are presented as mean ± standard deviation (SD) from at least three independent measurements unless otherwise specified, with error bars in figures representing SD and asterisks denoting significance levels (**P < 0.05, **P < 0.01, ***P < 0.001*).

# **Figures and Tables Caption:**

**
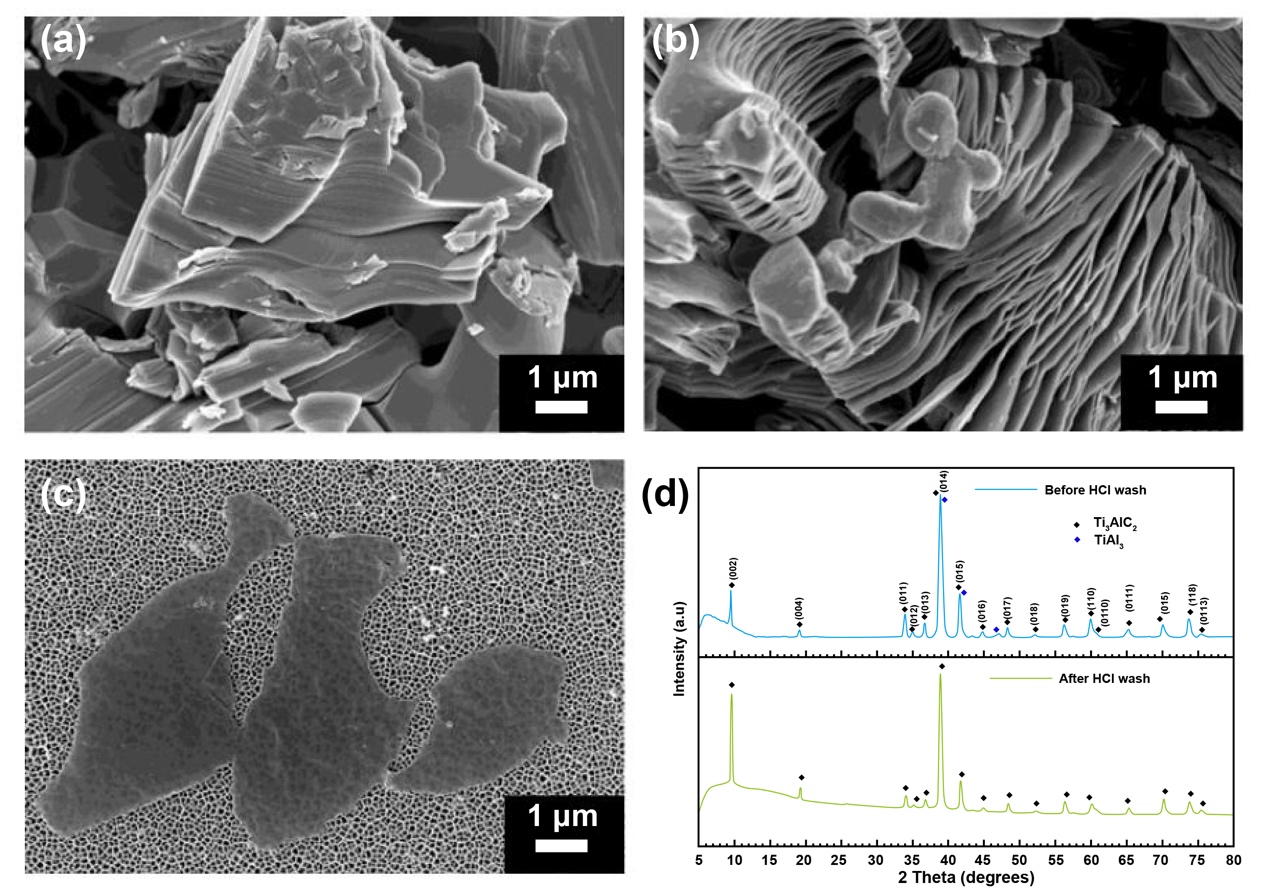
**

**Figure S1 Structural Evolution During Ti₃C₂Tₓ Synthesis.** SEM images showing: (a) Ti₃AlC₂ MAX phase precursor with layered bulk morphology, (b) multilayer Ti₃C₂Tₓ after HCl/LiF etching displaying accordion-like structure, (c) individual Ti₃C₂Tₓ nanosheets following delamination with characteristic 2D morphology. (d) XRD patterns comparing Ti₃AlC₂ before and after HCl washing, demonstrating impurity removal while preserving MXene crystallographic features. Scale bars: 1 μm.

**
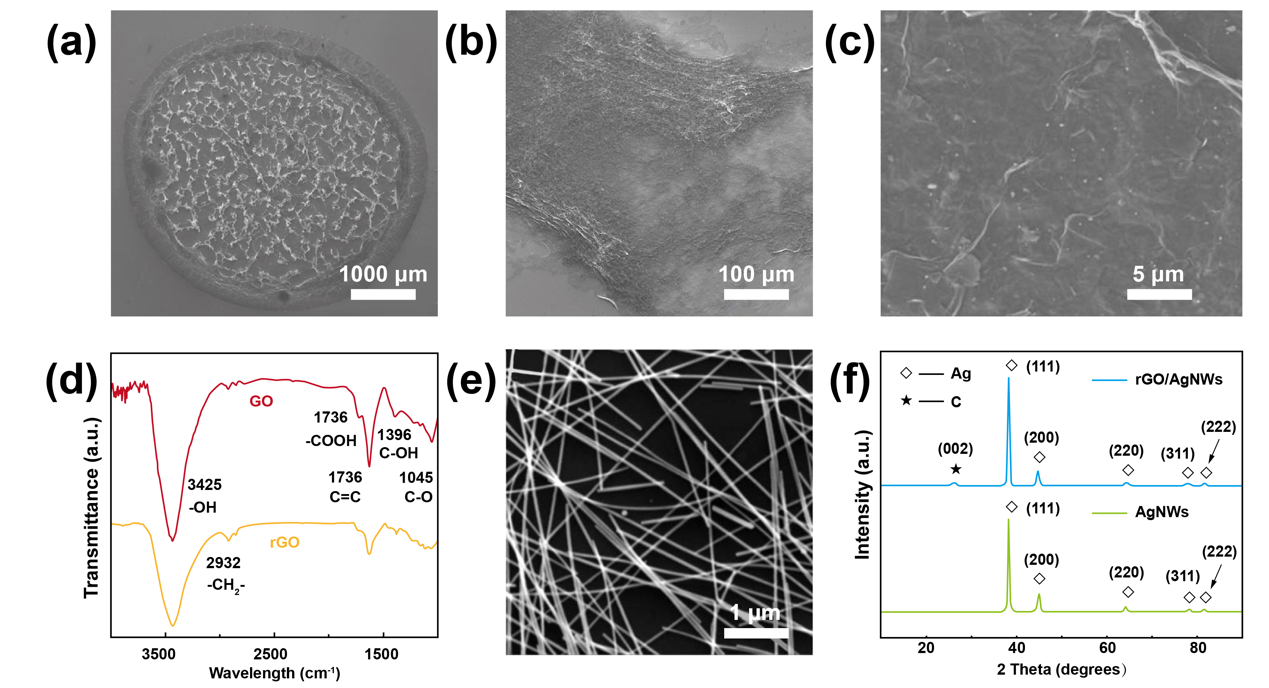
**

**Figure S2 Comprehensive morphological and structural characterization of GO, rGO, and AgNWs.** (a) SEM of GO at 75× magnification showing characteristic sheet morphology. (b) Surface micrograph of rGO at 1,000× magnification displaying surface topology following electrochemical reduction. (c) High-resolution surface micrograph of rGO at 20,000× magnification revealing detailed morphological features after reduction treatment. (d) FTIR spectra comparison of GO and rGO examining changes in functional groups following electrochemical reduction. (e) SEM of AgNWs at 20,000× magnification after drying from ethanol dispersion. (f) XRD patterns of pure AgNWs and rGO/AgNWs composite examining crystalline structure and phase composition.

**Figure S3 Evaluation of different component loadings, electrochemical testing, and operational stability of rGAM electrode.** (a) Effect of Ti3C2TX loading on DPV response to 10 μmol/L CIP (GO: 25 μg); inset shows peak region. (b) Effect of AgNWs loading on DPV response to 10 μmol/L CIP (GO: 25 μg). (c) Optimization of Ti3C2TX and AgNWs loading. (d) CV test for reduction of GO/AgNWs@Ti3C2TX (GAM) to rGO/AgNWs@Ti3C2TX (rGAM). (e) EIS and equivalent circuit fitting of rGAM electrode. (f) Anti-interference performance of rGAM electrode. (g) Electrochemical stability of rGAM electrode. (h) Linear fitting of Ipo and Ipr for diffusion coefficient calculation of rGAM electrode. (i) Reproducibility of rGAM electrode.

**Figure S4 Laser confocal microscopy of Ti₃C₂Tₓ-TiO₂ nanosheets during electrochemical oxidation.** (a-f) Macroscopic morphology at 0, 20, 40, 60, 90, and 120 min. (g-q) 40× fluorescence images showing the evolution of TiO₂ distribution. (r-w) 63× high-resolution images highlighting TiO₂ growth patterns on the MXene framework.

**Figure S5 Morphological evolution of Ti3C2TX-TiO2 nanosheets during electrochemical oxidation.** SEM images showing top views (a, d, g, j, m, p), side views (b, e, h, k, n, q), and corresponding C, O, Ti elemental mapping (c, f, i, l, o, r) of Ti₃C₂Tₓ nanosheets at different oxidation times: pristine (a-c), 20 min (d-f), 40 min (g-i), 60 min (j-l), 90 min (m-o), and 120 min (p-r).

**Figure S6 XPS analysis of Ti3C2TX-TiO2 nanosheets at different electrochemical oxidation times.** (a-b) C 1s spectra, (c-d) O 1s spectra, (e-f) Ti 2p spectra, and (g-i) corresponding elemental relative content statistical analysis for oxidation times of pristine (O₀), 20 min (O₂₀), 40 min (O₄₀), 60 min (O₆₀), 90 min (O₉₀), and 120 min (O₁₂₀).


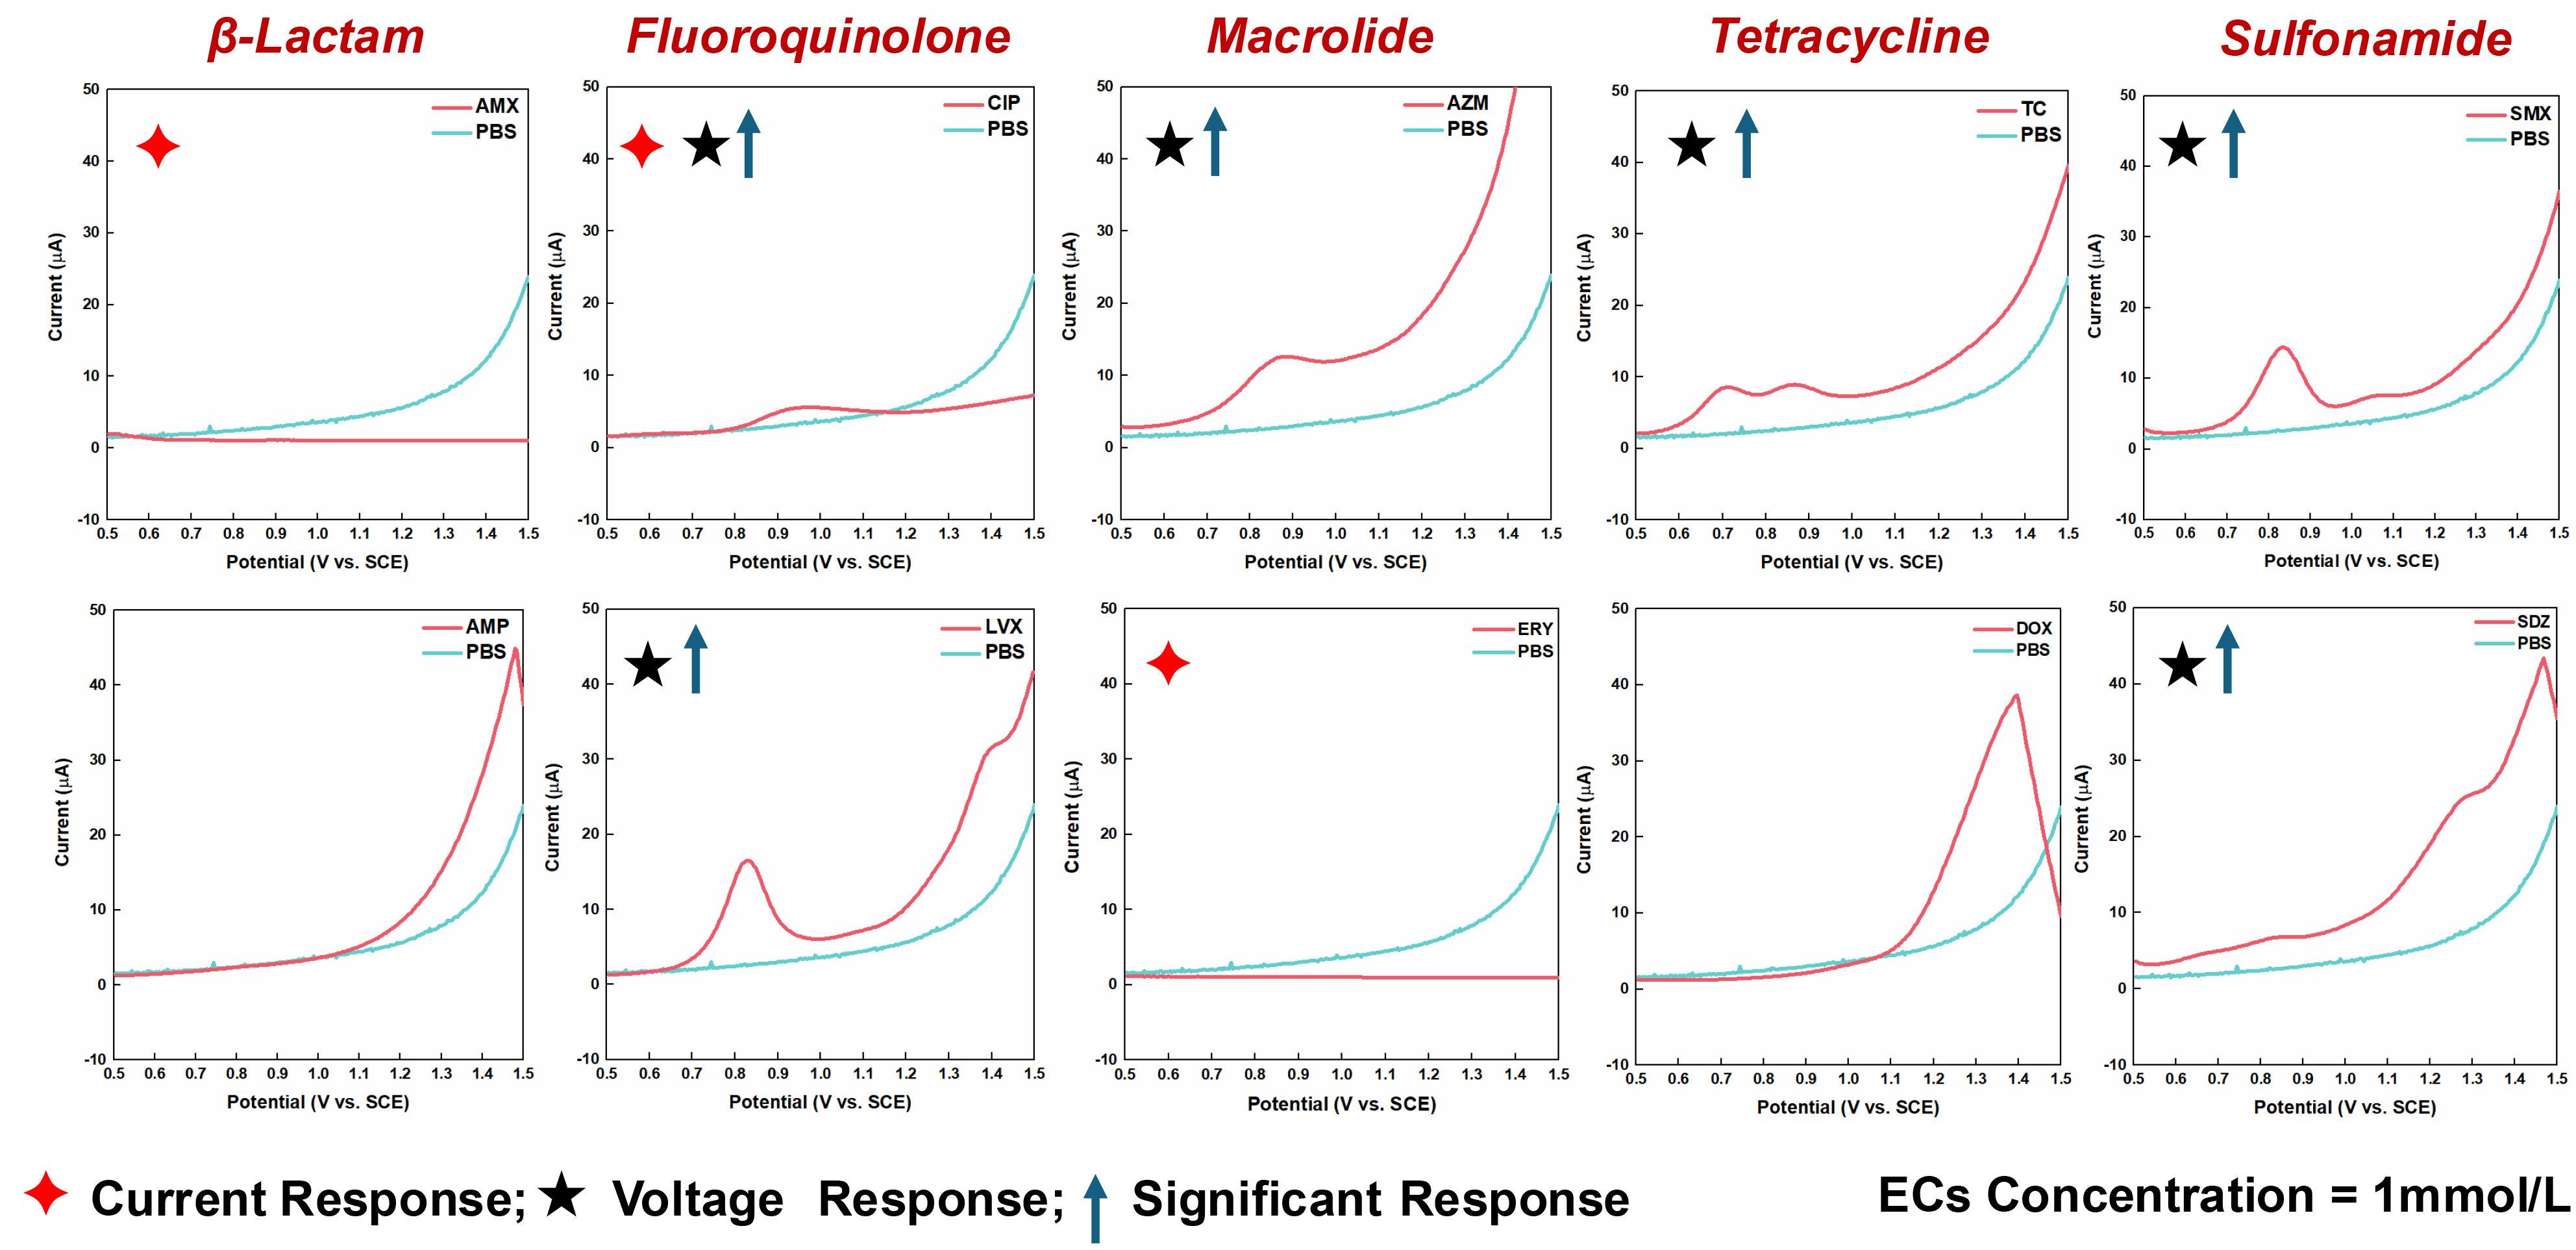


**Figure S7 Specific response of the rGAMO-ECs electrochemical sensor to five major classes of antibiotics in water (*****β-Lactam*,** ***Fluoroquinolone*, *Macrolide*, *Tetracycline*, and *Sulfonamide*).**

**Figure S8 SHAP dependency analysis of electrochemical features for rGAMO-ECs.** (a) I-T equilibrium time (s), (b) I-T response voltage (V), (c) I-T response current (μA), (d) LSV equilibrium time (s), (e) LSV response voltage (V), (f) LSV peak current (μA). Y-axis represents SHAP values for each feature, X-axis represents feature values. Color bars indicate different concentration level classifications with pink corresponding to high concentrations, cyan to medium concentrations, and blue to low concentrations. Trend lines generated using third-order polynomial regression algorithms showing average marginal effects. Blue-gray boundary regions represent 95% confidence intervals.

**Figure S9** **Real-time sensing performance of rGAMO-ECs for antibiotic detection (CIP and SMX) in diverse complex aquatic environments.** (a-c) Mingyuan Lake: (a) portable sensing apparatus deployment including high-power AC/DC mobile power supply, membraneless air pump, filtration apparatus, portable electrochemical workstation with mobile phone interface, rGAMO screen-printed electrodes with different substrates, and reaction chamber, (b) antibiotic detection in filtered Mingyuan Lake water samples, (c) C-rGAMO electrode adapted for slow-flowing lake water conditions. (d-f) Jiang'an River: (d) portable sensing apparatus deployment in Jiang'an River environment, (e) antibiotic detection in filtered Jiang'an River water samples, (f) Au-rGAMO electrode adapted for faster-flowing river water environments. (g-i) Pond: (g) portable sensing apparatus deployment in pond environment, (h) antibiotic detection in filtered pond water samples, (i) Pt-rGAMO electrode adapted for nearly stagnant pond water conditions. (j) Comparative analysis of filtration membranes (left to right: Mingyuan Lake water, Jiang'an River water, pond water), with color variations reflecting differences in organic matter (algae) and sediment content. (k) Mobile phone control interface of rGAMO-ECs during I-T electrochemical testing.

**Figure S10. LC-MS/MS validation and method comparison for vessel-based rGAMO-ECs system.** (a) Total ion chromatogram showing baseline separation of target analytes SMX (3.42 min, 8.24×10⁵ cps) and CIP (4.78 min, 1.18×10⁶ cps) from deuterated internal standards SMX-d4 (3.38 min) and CIP-d8 (4.73 min). (b) MS/MS fragmentation spectrum of CIP at collision energy 15 eV. (c) MS/MS fragmentation spectrum of SMX at collision energy 18 eV. (d) Calibration curves demonstrating excellent linearity over 0.3-5000 nmol/L concentration range: CIP (red line, y=1847x+232, R²=0.998) and SMX (blue line, y=2157x+184, R²=0.997). (e) Method correlation plot between rGAMO-ECs and LC-MS/MS measurements. (f) Bland-Altman plot assessing method agreement, showing mean difference of -11.6 nmol/L with 95% limits of agreement at ±48.7 nmol/L (dashed red lines).

**Table S1 Systematic Optimization of GO Loading for Electrode Foundation Performance**

| **GO Loading (μg)** | **Charge Transfer Resistance Rct (Ω)** | **Capacitive Behavior Exponent (n)** | **CIP Response Current (μA)** | **Stability Retention (%)** | **Reproducibility RSD (%)** |
| --- | --- | --- | --- | --- | --- |
| 5 | 892.3 ± 23.4 | 0.756 ± 0.018 | 3.2 ± 0.4 | 78.5 ± 3.2 | 12.8 |
| 10 | 654.7 ± 18.9 | 0.789 ± 0.015 | 5.8 ± 0.6 | 84.2 ± 2.8 | 9.6 |
| 15 | 478.2 ± 15.6 | 0.812 ± 0.012 | 8.9 ± 0.7 | 89.7 ± 2.1 | 7.4 |
| 20 | 356.4 ± 12.3 | 0.835 ± 0.009 | 12.4 ± 0.8 | 92.8 ± 1.8 | 5.2 |
| 25 | 298.1 ± 8.7 | 0.851 ± 0.007 | 15.7 ± 0.5 | 95.3 ± 1.2 | 3.1 |
| 30 | 334.8 ± 11.4 | 0.843 ± 0.011 | 13.2 ± 0.7 | 91.4 ± 1.9 | 4.8 |
| 35 | 387.5 ± 16.8 | 0.826 ± 0.014 | 10.8 ± 0.9 | 87.9 ± 2.4 | 6.7 |
| 40 | 445.3 ± 19.2 | 0.798 ± 0.016 | 8.1 ± 1.1 | 83.6 ± 3.1 | 8.9 |

Notes: All measurements were conducted in triplicate using 10 μmol/L levofloxacin as the target analyte in 0.1 M PBS (pH 7.6). EIS measurements were performed in 5 mM [Fe(CN)₆]³⁻/⁴⁻ and 0.1 M KCl solution over a frequency range from 10⁶ to 0.1 Hz. Stability retention was evaluated after 15-day storage at ambient conditions (25°C, 45% RH). Reproducibility was assessed across 6 independently fabricated electrodes. The optimal loading of 25 μg GO was selected based on the combination of lowest charge transfer resistance, highest capacitive behavior, maximum response current, and superior stability metrics. Statistical analysis was performed using one-way ANOVA with Tukey's post-hoc test (*p* < 0.05).

**Table S2 EIS Equivalent Circuit Fitting Parameters for rGAM**

| Sample | Rs  (Ω) | CPE  (μF.cm-2) | n | Rct  (Ω) | Zw |
| --- | --- | --- | --- | --- | --- |
| GO/AgNWs@Ti3C2TX | 3.305 | 11.88 | 0.831 | 136.8 | 0.00083 |
| GCE | 3.951 | 3.417 | 0.896 | 91.5 | 0.00146 |

Notes: The fitting was performed using ZView software version 10.0 with a nonlinear least squares method. Rs (Ω) represents the solution resistance, indicating the resistance of the electrolyte and any contact resistances. CPE (μF·cm-2) is the Constant Phase Element, accounting for the non-ideal capacitive behavior at the electrode interface. The exponent n describes the deviation from ideal capacitive behavior, where 1 indicates a perfect capacitor. Rct (Ω) denotes the charge transfer resistance, associated with the kinetics of the electrochemical reaction. Zw represents the Warburg impedance, related to ion diffusion in the electrolyte.

**Table S3 Fitting Parameters from Cyclic Voltammetry Stability Tests for rGO/AgNWs@Ti3C2TX Sensor**

| Ipo（mA/cm2） | Ipr（mA/cm2） | 1/2（mV/s） |
| --- | --- | --- |
| 0.33393984 | -0.49631296 | 4.472 |
| 0.54468544 | -0.65133127 | 6.325 |
| 0.6661824 | -0.76830208 | 7.746 |
| 0.73775104 | -0.88442432 | 8.944 |
| 0.81101696 | -0.96561088 | 10.000 |
| 0.98244224 | -1.08951232 | 10.954 |
| 1.02925888 | -1.14962432 | 11.832 |
| 1.08710784 | -1.20959488 | 12.649 |
| 1.15726208 | -1.24467209 | 13.416 |
| 1.22586048 | -1.27960768 | 14.142 |
| 1.27692032 | -1.32274688 | 14.832 |
| 1.31454336 | -1.37875712 | 15.492 |

Notes: Ipo represents the rate of the oxidation reaction at the electrode surface, while Ipr indicates the rate of the reduction reaction. 1/2 denotes the square root of the scan rate, which is utilized to assess diffusion-controlled processes within the electrochemical system.

**Table S4 Electrochemical response data of rGAMO-ECs for CIP and SMX detection**

|  | **Concentration (nM)** | **100** | **200** | **300** | **400** | **500** | **600** | **700** | **800** | **900** | **1000** |
| --- | --- | --- | --- | --- | --- | --- | --- | --- | --- | --- | --- |
| **CIP I-T Response** | Equilibrium Current (μA) | -0.045 | -0.041 | -0.038 | -0.033 | -0.028 | -0.022 | -0.017 | -0.012 | -0.008 | -0.005 |
| Response Time (s) | 28.5 | 25.2 | 22.8 | 19.6 | 16.4 | 13.2 | 10.8 | 8.4 | 6.2 | 4.1 |
| Current at t=5s (μA) | -0.0521 | -0.0476 | -0.0438 | -0.0385 | -0.0324 | -0.0257 | -0.0189 | -0.0124 | -0.0084 | -0.0061 |
| Current at t=10s (μA) | -0.0468 | -0.0428 | -0.0394 | -0.0346 | -0.0291 | -0.0231 | -0.0170 | -0.0112 | -0.0076 | -0.0055 |
| Current at t=20s (μA) | -0.0452 | -0.0413 | -0.0380 | -0.0334 | -0.0281 | -0.0223 | -0.0164 | -0.0108 | -0.0073 | -0.0053 |
| Current at t=30s (μA) | -0.0450 | -0.0412 | -0.0379 | -0.0333 | -0.0280 | -0.0222 | -0.0164 | -0.0108 | -0.0073 | -0.0052 |
| **SMX I-T Response** | Equilibrium Current (μA) | -0.170 | -0.152 | -0.134 | -0.114 | -0.092 | -0.068 | -0.046 | -0.032 | -0.025 | -0.020 |
| Response Time (s) | 89.3 | 85.7 | 81.2 | 76.8 | 71.4 | 65.9 | 59.3 | 52.1 | 44.8 | 37.2 |
| Current at t=10s (μA) | -0.186 | -0.167 | -0.147 | -0.125 | -0.101 | -0.075 | -0.051 | -0.035 | -0.028 | -0.022 |
| Current at t=30s (μA) | -0.178 | -0.159 | -0.140 | -0.119 | -0.096 | -0.071 | -0.048 | -0.033 | -0.026 | -0.021 |
| Current at t=60s (μA) | -0.173 | -0.155 | -0.136 | -0.116 | -0.094 | -0.069 | -0.047 | -0.032 | -0.025 | -0.020 |
| Current at t=90s (μA) | -0.170 | -0.152 | -0.134 | -0.114 | -0.092 | -0.068 | -0.046 | -0.032 | -0.025 | -0.020 |
| **CIP LSV Response** | Peak Potential (V vs. SCE) | 1.348 | 1.345 | 1.342 | 1.338 | 1.334 | 1.329 | 1.324 | 1.318 | 1.313 | 1.307 |
| Peak Current (μA) | 98.2 | 99.1 | 99.8 | 100.5 | 101.2 | 101.9 | 102.6 | 103.3 | 104.0 | 104.7 |
| Voltage at 100 μA (V) | 1.350 | 1.347 | 1.344 | 1.340 | 1.336 | 1.332 | 1.327 | 1.322 | 1.317 | 1.312 |
| **SMX LSV Response** | Peak Potential (V vs. SCE) | 1.218 | 1.221 | 1.224 | 1.228 | 1.232 | 1.236 | 1.240 | 1.244 | 1.247 | 1.250 |
| Peak Current (μA) | 97.8 | 98.4 | 99.0 | 99.6 | 100.2 | 100.8 | 101.4 | 102.0 | 102.6 | 103.2 |
| Voltage at 100 μA (V) | 1.220 | 1.225 | 1.230 | 1.235 | 1.240 | 1.242 | 1.245 | 1.247 | 1.249 | 1.250 |

**Table S5 Detailed classification performance and confusion matrix analysis**

| Performance Metric | XGBoost | Random Forest | SVM (RBF) | Unit |
| --- | --- | --- | --- | --- |
| Confusion Matrix - CIP Classified as CIP | 147 | 145 | 142 | count |
| Confusion Matrix - CIP Classified as SMX | 2 | 3 | 5 | count |
| Confusion Matrix - CIP Classified as Mix | 1 | 2 | 3 | count |
| Confusion Matrix - SMX Classified as CIP | 1 | 2 | 4 | count |
| Confusion Matrix - SMX Classified as SMX | 145 | 143 | 138 | count |
| Confusion Matrix - SMX Classified as Mix | 4 | 5 | 8 | count |
| Confusion Matrix - Mix Classified as CIP | 2 | 3 | 5 | count |
| Confusion Matrix - Mix Classified as SMX | 3 | 4 | 7 | count |
| Confusion Matrix - Mix Classified as Mix | 148 | 145 | 141 | count |
| Class-specific Precision (CIP) | 0.980 ± 0.007 | 0.967 ± 0.011 | 0.940 ± 0.015 | - |
| Class-specific Precision (SMX) | 0.967 ± 0.009 | 0.949 ± 0.013 | 0.921 ± 0.018 | - |
| Class-specific Precision (Mix) | 0.967 ± 0.008 | 0.950 ± 0.012 | 0.915 ± 0.019 | - |
| Class-specific Recall (CIP) | 0.980 ± 0.006 | 0.967 ± 0.010 | 0.947 ± 0.014 | - |
| Class-specific Recall (SMX) | 0.967 ± 0.008 | 0.953 ± 0.011 | 0.920 ± 0.017 | - |
| Class-specific Recall (Mix) | 0.965 ± 0.009 | 0.947 ± 0.013 | 0.908 ± 0.020 | - |

Notes: Confusion matrix entries represent counts from 450 total test samples (150 per class). Class-specific precision calculated as TP/(TP+FP) for each antibiotic category. Class-specific recall calculated as TP/(TP+FN) for each category. All metrics reported as mean ± standard deviation from 10-fold cross-validation. XGBoost demonstrates superior performance with balanced precision-recall trade-offs across all classes. Misclassification patterns indicate highest confusion between CIP and mixture samples, likely due to overlapping electrochemical signatures at intermediate concentration ranges.

**Table S6 Machine learning dimensionality reduction and classification performance**

| Analysis Method | t-SNE Clustering | ROC Analysis | Model Comparison | Statistical Test |
| --- | --- | --- | --- | --- |
| Metric | Value | Value | Value | p-value |
| Silhouette Score | 0.847 ± 0.012 | - | - | - |
| Davies-Bouldin Index | 0.421 ± 0.018 | - | - | - |
| Calinski-Harabasz Index | 287.3 ± 15.2 | - | - | - |
| Cluster Separation (CIP-SMX) | 7.82 ± 0.34 | - | - | <0.001¹ |
| Cluster Separation (CIP-Mix) | 5.91 ± 0.28 | - | - | <0.001¹ |
| Cluster Separation (SMX-Mix) | 4.67 ± 0.31 | - | - | <0.001¹ |
| AUC-ROC (XGBoost) | - | 0.987 ± 0.003 | 0.987 | <0.001² |
| AUC-ROC (Random Forest) | - | 0.968 ± 0.006 | 0.968 | <0.001² |
| AUC-ROC (SVM) | - | 0.941 ± 0.008 | 0.941 | <0.001² |
| Optimal Threshold (XGBoost) | - | 0.523 | - | - |
| Sensitivity at Optimal Threshold | - | 0.971 ± 0.005 | - | - |

Notes: Silhouette Score measures cluster cohesion and separation (range: -1 to 1, higher is better). Davies-Bouldin Index quantifies cluster similarity (lower values indicate better separation). Calinski-Harabasz Index evaluates cluster variance ratios (higher indicates better-defined clusters). Cluster Separation represents Euclidean distance between cluster centroids in t-SNE space. AUC-ROC measures discriminative ability across all classification thresholds. Optimal Threshold determined using Youden's J statistic maximizing sensitivity + specificity - 1. All metrics calculated using 10-fold cross-validation with 1000 bootstrap iterations.
¹ MANOVA test for multivariate cluster separation.
² DeLong test comparing ROC curves between models.

**Table S7 SHAP feature importance analysis and polynomial regression performance**

|  | **Feature Parameter** | **Concentration/Type** | **Mean |SHAP| Value** | **Std Dev** | | **95% CI** | **Feature Rank** | **Polynomial Order** | **RMSE** | **MAE** | **R²** | **F-statistic** | **p-value** | **Sample Size** |
| --- | --- | --- | --- | --- | --- | --- | --- | --- | --- | --- | --- | --- | --- | --- |
| Concentration Features | Low Range | 100 nM | 0.112 | 0.018 | | (0.076, 0.148) | 1 | 3rd | 1.720 | 1.364 | 0.847 | 156.8 | <0.001 | 150 |
| Low Range | 200 nM | 0.104 | 0.016 | | (0.072, 0.136) | 2 | 3rd | 1.720 | 1.364 | 0.847 | 156.8 | <0.001 | 150 |
| Low Range | 300 nM | 0.094 | 0.015 | | (0.064, 0.124) | 3 | 3rd | 1.720 | 1.364 | 0.847 | 156.8 | <0.001 | 150 |
| Medium Range | 400 nM | 0.077 | 0.013 | | (0.051, 0.103) | 4 | 3rd | 1.753 | 1.402 | 0.834 | 139.2 | <0.001 | 150 |
| Medium Range | 500 nM | 0.070 | 0.012 | | (0.046, 0.094) | 5 | 3rd | 1.753 | 1.402 | 0.834 | 139.2 | <0.001 | 150 |
| Medium Range | 600 nM | 0.061 | 0.011 | | (0.039, 0.083) | 6 | 3rd | 1.753 | 1.402 | 0.834 | 139.2 | <0.001 | 150 |
| Medium Range | 700 nM | 0.055 | 0.010 | | (0.035, 0.075) | 7 | 3rd | 1.753 | 1.402 | 0.834 | 139.2 | <0.001 | 150 |
| High Range | 800 nM | 0.059 | 0.011 | | (0.037, 0.081) | 8 | 3rd | 1.958 | 1.566 | 0.798 | 109.8 | <0.001 | 150 |
| High Range | 900 nM | 0.040 | 0.008 | | (0.024, 0.056) | 9 | 3rd | 1.958 | 1.566 | 0.798 | 109.8 | <0.001 | 150 |
| High Range | 1000 nM | 0.030 | 0.006 | | (0.018, 0.042) | 10 | 3rd | 1.958 | 1.566 | 0.798 | 109.8 | <0.001 | 150 |
| I-T Features | I-T | Equilibration Time | 0.089 | 0.014 | | (0.061, 0.117) | - | 3rd | 1.720 | 1.364 | 0.847 | 156.8 | <0.001 | 300 |
| I-T | Response Voltage | 0.095 | 0.012 | | (0.071, 0.119) | - | 3rd | 1.177 | 0.934 | 0.912 | 287.4 | <0.001 | 300 |
| I-T | Response Current | 0.082 | 0.015 | | (0.052, 0.112) | - | 3rd | 1.469 | 1.175 | 0.876 | 196.7 | <0.001 | 300 |
|  |  |  |  |  | |  |  |  |  |  |  |  |  |  |
| LSV Features | LSV | Equilibration Time | 0.078 | 0.016 | | (0.046, 0.110) | - | 3rd | 1.753 | 1.402 | 0.834 | 139.2 | <0.001 | 300 |
| LSV | Response Voltage | 0.091 | 0.018 | | (0.055, 0.127) | - | 3rd | 1.958 | 1.566 | 0.798 | 109.8 | <0.001 | 300 |
| LSV | Peak Current | 0.074 | 0.020 | | (0.034, 0.114) | - | 3rd | 2.266 | 1.846 | 0.743 | 80.3 | <0.001 | 300 |
| Antibiotic Type Distribution | CIP | Negative SHAP | -0.187 | 0.094 | (-0.371, -0.003) | | - | - | - | - | - | - | <0.001¹ | 300 |
| SMX | Positive SHAP | +0.201 | 0.087 | (+0.030, +0.372) | | - | - | - | - | - | - | <0.001¹ | 300 |

**Notes:** Mean |SHAP| Value represents the average absolute importance score for each feature in model predictions, with higher values indicating greater influence on antibiotic classification. Feature Rank orders features from 1 (most important) to 10 (least important) based on mean SHAP values. RMSE (Root Mean Square Error) and MAE (Mean Absolute Error) quantify the accuracy of third-order polynomial fits to SHAP dependency curves, with lower values indicating better fit quality. R² measures the proportion of SHAP value variance explained by polynomial regression (0-1 scale, higher is better). F-statistic and p-values assess the statistical significance of polynomial relationships. 95% CI provides confidence intervals for mean estimates. Sample Size indicates the number of data points used to calculate each feature importance. Standard Deviation reflects the variability of SHAP values, while Polynomial Order denotes the degree of polynomial used to fit SHAP dependency relationships.

¹ indicates Mann-Whitney U test for SHAP distribution differences between CIP and SMX.

**Table S8. Method Validation for Simultaneous CIP and SMX Detection in Complex Aquaculture Wastewater**

| **Sample Matrixa** | **Target Analyte** | **Spiked (nmol/L)** | **Measured Concentrationb** | | **Matrix Effect (%)c** | **Recovery (%)** | **Co-existing Interferentsd** |
| --- | --- | --- | --- | --- | --- | --- | --- |
| **rGAMO-ECs (nmol/L)** | **LC-MS/MS (nmol/L)** |
| Fish Pond Effluent (Site A) | CIP | 100 | 86.4 ± 5.23 | 97.8 ± 2.14 | -11.7 | 86.4 | OTC: 45.3 TC: 28.7 SMZ: 62.4 ENR: 15.8 DOM: 23.6 |
| SMX | 100 | 85.1 ± 6.42 | 96.3 ± 2.85 | -11.6 | 85.1 |
| CIP | 500 | 432 ± 14.8 | 484 ± 5.43 | -10.7 | 86.4 |
| SMX | 500 | 426 ± 17.3 | 477 ± 6.21 | -10.7 | 85.2 |
| CIP | 1000 | 851 ± 28.4 | 972 ± 8.76 | -12.4 | 85.1 |
| SMX | 1000 | 863 ± 31.2 | 981 ± 11.4 | -12.0 | 86.3 |
| Shrimp Pond Effluent (Site B) | CIP | 100 | 83.6 ± 6.74 | 95.4 ± 2.76 | -12.4 | 83.6 | SDZ: 78.2 STZ: 34.5 NOR: 41.3 FLO: 56.7 TMP: 18.9 |
| SMX | 100 | 81.4 ± 7.13 | 94.2 ± 3.12 | -13.6 | 81.4 |
| CIP | 500 | 418 ± 16.2 | 471 ± 6.84 | -11.2 | 83.6 |
| SMX | 500 | 407 ± 19.5 | 463 ± 7.52 | -12.1 | 81.4 |
| CIP | 1000 | 842 ± 32.7 | 963 ± 12.3 | -12.6 | 84.2 |
| SMX | 1000 | 823 ± 35.4 | 954 ± 13.7 | -13.7 | 82.3 |
| Mixed Sample (CIP+SMX)e | CIP | 500 | 412 ± 18.3 | 468 ± 7.23 | -12.0 | 82.4 | All above interferents present |
| SMX | 500 | 403 ± 20.1 | 461 ± 8.14 | -12.6 | 80.6 |
| Total | 1000 | 815 | 929 | -12.3 | 81.5 |
| LOD in Matrixf | | - | CIP: 68.5 SMX: 8.32 | CIP: 0.486 SMX: 0.357 | - | - | - |
| Organic Loadg | | - | COD: 186-342 mg/L; BOD₅: 95-168 mg/L; DOC: 52.8-97.3 mg/L; TSS: 124-287 mg/L | | | | |
| Water Qualityh | | - | pH: 7.2-8.4; Temp: 25-28°C; DO: 3.2-5.8 mg/L; NH₃-N: 12.5-35.7 mg/L | | | | |

a Samples collected from intensive aquaculture facilities in Sichuan Province during peak feeding periods (summer 2024). Both sites practice polyculture systems.

b Mean ± standard deviation (n = 6). Matrix-matched calibration curves were used for LC-MS/MS quantification to minimize matrix effects.

c Matrix effect (%) = [(slope matrix – slope solvent)/slope solvent] × 100. Negative values indicate ion suppression due to co-eluting compounds.

d Concentrations in nmol/L. OTC = oxytetracycline, TC = tetracycline, SMZ = sulfamethazine, ENR = enrofloxacin, DOM = doxycycline, SDZ = sulfadiazine, STZ = sulfathiazole, NOR = norfloxacin, FLO = florfenicol, TMP = trimethoprim. These antibiotics are commonly used in aquaculture and cause significant cross-reactivity.

e Mixed sample spiked with both CIP and SMX simultaneously to evaluate mutual interference effects.

f LOD calculated as 3σ/S using matrix-matched standards. Increased LOD compared to pure water due to organic matter interference and competitive binding.

g COD = Chemical Oxygen Demand, BOD₅ = 5-day Biochemical Oxygen Demand, DOC = Dissolved Organic Carbon, TSS = Total Suspended Solids. High organic load from uneaten feed, fecal matter, and algal biomass.

h DO = Dissolved Oxygen, NH₃-N = Ammonia Nitrogen. These parameters significantly affect sensor performance and antibiotic stability

**Table S9 Performance Comparison of rGAMO-ECs with Recent Literature**

| **Electrode Material** | **Target Antibiotic** | **Method** | **LOD** | **Linear Range** | **Detection Scope** | **Portable** | **Year** | **Reference** |
| --- | --- | --- | --- | --- | --- | --- | --- | --- |
| **rGO/AgNWs@Ti₃C₂Tₓ-TiO2** | **6 Different antibiotics** | **LSV/I-T** | **0.004 µmol/L** | **0.001-1000 µmol/L** | **Multiplex** | **Yes** | **This work** | **This work** |
| eCNF/CNT/NiCo/GCE | Ciprofloxacin only | DPV | 0.006 µmol/L | 0.025-0.3 µmol/L | Single | No | 2023 | [1] |
| AuNPs/AC/GCE+SUPRAS | Ciprofloxacin only | LSV | 0.0002 µmol/L | 5-25 nmol/L | Single | No | 2021 | [2] |
| rGO-MIP-PANI-oPDA/GCE | Ciprofloxacin only | DPV | 0.053 µmol/L | 1.0-500 µmol/L | Single | No | 2023 | [3] |
| g-C₃N₄/ZnO/GCE | Sulfamethoxazole only | DPV | 0.0066 µmol/L | 0.02-1100 µmol/L | Single | No | 2018 | [4] |
| M-Chs-Aci/CPE | Sulfamethazine only | I-T | 0.021 µmol/L | N/A | Single | Partially | 2024 | [5] |
| Co@CaPO4/GCE | Levofloxacin only | DPV | 0.12 µmol/L | 0.5-100 µmol/L | Single | No | 2024 | [6] |
| GO/SPCE | Ciprofloxacin only | DPV | 0.30 µmol/L | 1.0-8.0 µmol/L | Single | Yes | 2021 | [7] |
| Ag/GO/BDD | Tetracycline only | SWV | 5 nmol/L | 0.01-10 µmol/L | Single | No | 2021 | [8] |
| MIP/NG/ePAD | Tetracycline only | SWV | 3.29 nmol/L | 0.005-10 µmol/L | Single | Yes | 2024 | [9] |
| β-CD/Sm₂O₃/LIGr | Ofloxacin only | DPV | 0.65 µmol/L | 2.0-20 µmol/L | Single | No | 2023 | [10] |

**References:**

[1] Smajdor et al., *Membranes*, 2023, 13, 682. DOI: 10.3390/membranes13070682

[2] Gissawong et al., *Microchim. Acta*, 2021, 188, 208. DOI: 10.1007/s00604-021-04869-z

[3] Chuiprasert et al., *ACS Omega*, 2023, 8, 2564-2574. DOI: 10.1021/acsomega.2c07095

[4] Balasubramanian et al., *Microchim. Acta*, 2018, 185, 394. DOI: 10.1007/s00604-018-2934-z

[5] Abd-Elsabour et al., *ACS Omega*, 2024, 9, 17323-17333. DOI: 10.1021/acsomega.3c10390

[6] Alagumalai et al., *Environ. Pollut.*, 2024, 343, 123189. DOI: 10.1016/j.envpol.2023.123189

[7] Pan et al., *J. Anal. Sci. Technol.*, 2021, 12, 51. DOI: 10.1186/s40543-021-00309-y

[8] Manea et al., *Nanomaterials*, 2021, 11, 1566. DOI: 10.3390/nano11061566

[9] Wang et al., *Microchem. J.*, 2024, 207, 111788. DOI: 10.1016/j.microc.2024.111788

[10] Liu et al., *Microchem. J.*, 2023, 186, 108353. DOI: 10.1016/j.microc.2022.108353

**Table S10 Molecular rotational angle and adsorption energy evolution**

| **Rotational Angle** | **CIP Binding Energy (eV)** | **SMX Binding Energy (eV)** | **CIP Group Contributions** | **SMX Group Contributions** |
| --- | --- | --- | --- | --- |
| 0° (Initial) | -1.24 | -1.67 | F atom: -0.78, O atom: -0.46 | Sulfonyl O: -1.21, Oxazole: -0.46 |
| 23° | -1.89 | -1.98 | F atom: -0.89, O atom: -1.00 | Sulfonyl O: -1.31, S atom: -0.67 |
| 31° | -2.12 | -2.15 | F atom: -0.94, O atom: -1.18 | Sulfonyl O: -1.35, S atom: -0.80 |
| 38° (CIP Optimal) | -2.47 | -2.28 | F atom: -1.02, O atom: -1.45 | Sulfonyl O: -1.41, S atom: -0.87 |
| 45° (SMX Optimal) | -2.31 | -2.83 | F atom: -0.98, O atom: -1.33 | Sulfonyl O: -1.47, S atom: -0.94, Oxazole O: -0.42 |

Notes: All energies calculated using DFT-D3 method with PBE functional and 500 eV cutoff energy. Group contributions determined through natural bond orbital (NBO) analysis. Optimal configurations represent global energy minima within ±0.02 eV convergence criteria.

**Table S11 Molecular-surface interaction energy component decomposition**

| **Interaction Type** | **CIP (38° Configuration)** | **SMX (45° Configuration)** | **Calculation Method** |
| --- | --- | --- | --- |
| Total Binding Energy | -2.47 | -2.83 | DFT-D3 total energy |
| Electrostatic Interactions | -0.52 | -0.89 | Bader charge analysis |
| F-Ti electrostatic binding | -0.31 | - | Point charge model |
| O-Ti electrostatic binding | -0.21 | -0.35 | Point charge model |
| S-Ti electrostatic binding | - | -0.54 | Point charge model |
| Covalent Bonding | -1.12 | -1.47 | Orbital overlap analysis |
| π-π stacking (with rGO) | -0.73 | -0.24 | π orbital overlap integral |
| Coordination bonds (with AgNWs) | -0.39 | -0.61 | d-p orbital hybridization |
| Ti-O covalent bonds | - | -0.62 | Ti d-O p overlap |
| van der Waals Forces | -0.51 | -0.31 | DFT-D3 dispersion correction |
| Induced Dipole Interactions | -0.32 | -0.16 | Polarizability calculation |

Notes: Energy decomposition performed using natural energy decomposition analysis (NEDA). Orbital overlap integrals calculated with Mulliken population analysis. Van der Waals contributions determined through Grimme D3 dispersion correction with Becke-Johnson damping. All calculations performed with 3×3×1 Monkhorst-Pack k-point sampling and 20 Å vacuum layer.

# **References**

1. Downes M, Shuck CE, McBride B, Busa J, Gogotsi Y. Comprehensive synthesis of Ti3C2T x from MAX phase to MXene. *Nat Protoc* **19**, 1807-1834 (2024).

2. Gurzęda B, Boulanger N, Nordenström A, Dejoie C, Talyzin AV. Pristine MXene: in situ XRD study of MAX phase etching with HCl+ LiF solution. *Adv Sci* **11**, 2408448 (2024).

3. Shah SS*, et al.* Electrochemical synergy and future prospects: Advancements and challenges in MXene and MOFs composites for hybrid supercapacitors. *Sustainable MaterTechnol* **39**, e00814 (2024).

4. Zhang T, Shevchuk K, Wang RJ, Kim H, Hourani J, Gogotsi Y. Delamination of chlorine-terminated MXene produced using molten salt etching. *Chem Mater* **36**, 1998-2006 (2024).

5. Marcano DC*, et al.* Improved synthesis of graphene oxide. *ACS Nano* **4**, 4806-4814 (2010).

6. Rathnakumar S, Bhaskar S, Sivaramakrishnan V, Kambhampati NSV, Srinivasan V, Ramamurthy SS. Tecoma stans floral extract-based biosynthesis for enhanced surface plasmon-coupled emission and a preliminary study on fluoroimmunoassay. *Anal Chem* **96**, 4005-4012 (2024).

7. Shi Y, Fang J. Large-scale synthesis of high-purity silver nanowires with reduced diameters by the polyethylene glycol-assisted polyol method. *The Journal of Physical Chemistry C* **126**, 19866-19871 (2022).

8. Fu D, Yang R, Wang Y, Wang R, Hua F. Silver nanowire synthesis and applications in composites: progress and prospects. *Adv Mater Technol* **7**, 2200027 (2022).

9. You W, Liao B, Wan S, Guo X. Research progress on the stability of transparent conductive films for silver nanowires. *Microelectron Reliab* **156**, 115394 (2024).

10. Kavak Oz, Can B, Bat E. Water-Based Route for Dopamine and Reduced Graphene Oxide Aerogel Production. *ACS Omega* **8**, 46728-46737 (2023).

11. Ismail NAB, Abd-Wahab F, Salim WWAW. Cyclic voltammetry and electrochemical impedance spectroscopy of partially reduced graphene oxide-PEDOT: PSS transducer for biochemical sensing. In: *2018 IEEE-EMBS Conference on Biomedical Engineering and Sciences (IECBES)*). IEEE (2018).

12. Cleveland WS. Robust locally weighted regression and smoothing scatterplots. *J Am Stat Assoc* **74**, 829-836 (1979).

13. R Core Team R. R: A language and environment for statistical computing. (2013).

14. Watts JF, Wolstenholme J. *An introduction to surface analysis by XPS and AES*. John Wiley & Sons (2019).

15. Virtanen P*, et al.* SciPy 1.0: fundamental algorithms for scientific computing in Python. *Nat Methods* **17**, 261-272 (2020).

16. Sievert C. *Interactive web-based data visualization with R, plotly, and shiny*. Chapman and Hall/CRC (2020).

1. The first two authors contributed equally to this paper.

   * Correspondence to: Sichuan University, Chengdu, Sichuan Province, 610065, China. E-mail addresses: [hgguo@scu.edu.cn](mailto:hgguo@scu.edu.cn) (Hongguang Guo); University of New South Wales, Sydney, NSW, 2052, Australia. E-mail addresses: [min.zheng1@unsw.edu.au](mailto:min.zheng1@unsw.edu.au) (Min Zheng). [↑](#footnote-ref-1)
